# Supplementary material for: A theoretical roadmap for the best oxygen reduction activity in two-dimensional transition metal tellurides
Source: Royal Society of Chemistry journal article supplement (doi:10.1039/d2sc03686j), 2022-01-01
Supplement: d2sc03686j1.pdf [file d2sc03686j1.pdf]

## Supplementary Information

### Theoretical Roadmap for Best Oxygen Reduction Activity in Two-dimensional Transition Metal Tellurides

Xin Yang,<sup>a,b</sup> Hanyu Liu,<sup>a,b,c,d</sup> Zexing Qu,<sup>c</sup> Yu Xie,<sup>\*a,b,c</sup> and Yanming Ma<sup>a,b,d</sup>

<sup>a</sup>State Key Laboratory of Superhard Materials, College of Physics, Jilin University, Changchun 130012, China

<sup>b</sup>International Center of Computational Method and Software, College of Physics, Jilin University, Changchun 130012, China

<sup>c</sup>Key Laboratory of Physics and Technology for Advanced Batteries (Ministry of Education), College of Physics, Jilin University, Changchun 130012, China

<sup>d</sup>International Center of Future Science, Jilin University, Changchun 130012, China

<sup>e</sup>Institute of Theoretical Chemistry, College of Chemistry, Jilin University, Changchun, 130023, China

Corresponding author: Yu Xie

E-mail address: xieyu@jlu.edu.cn

#### This file includes:

- Methods
- Geometric and Electronic Properties (Figure S1-2)
- Origin of O<sub>2</sub> activation (Figure S3-11)
- ORR catalytic performance and linear scaling (Figure S12-18)
- Rational screening of activity descriptor (Figure S19-27)
- Supplementary Tables (Table S1-7)
- References

## Methods

### Computational details

Density functional theory computations were performed by using the Vienna *Ab initio* simulation package (VASP) within the projected augmented wave method.<sup>1,2</sup> The Brillouin zone was sampled using k-points of 4×4×1 for the supercell with a×b of around 10 Å×10 Å.<sup>3</sup> For some monolayers with a×b of around 20 Å×10 Å, such as Ta<sub>4</sub>Pd<sub>3</sub>Te<sub>16</sub>, the k-points were sampled using 2×4×1. The *p*-band center ( $\varepsilon_p$ ) of the Te sites was calculated by

$$\varepsilon_p = \frac{\int_{-\infty}^0 \varepsilon \rho_p(\varepsilon) d\varepsilon}{\int_{-\infty}^0 \rho_p(\varepsilon) d\varepsilon} \quad (1)$$

where  $\rho_p(\varepsilon)$  is the *p*-band density of states of a Te atom and  $\varepsilon$  is the energy of electrons.

### ORR Reactions

The 4e<sup>-</sup> dissociative and associative mechanism pathways for ORR are generally the following equations (2) and (3), respectively.<sup>4</sup> Here, \* denotes an adsorption site of the catalyst.

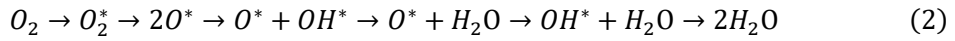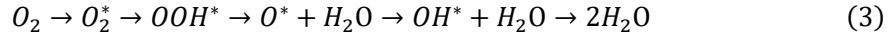

The free energy of each species can be expressed using the equation:

$$G = E_{DFT} + E_{ZPE} + \int C_p dT - TS \quad (4)$$

where  $E_{DFT}$ ,  $E_{ZPE}$  and  $S$  are the ground state electronic energy, zero-point vibrational energy and entropy, respectively. The values of  $E_{ZPE}$  and  $S$  of intermediates are obtained from frequency calculations and the values for molecules are taken from the NIST database (Computational Chemistry Comparison and Benchmark Database), which are listed in Table S6.  $T$  is the temperature of 298.15 K. Solvent effects have been considered by using the Poisson-Boltzmann implicit solvation model.<sup>5</sup> The dielectric constant  $\varepsilon$  is taken as 80 for water. The absorption free energy for the adsorbates can be calculated using the equation:

$$\Delta G_{ads} = \Delta E_{ads} + \Delta E_{ZPE} - T\Delta S \quad (5)$$

where  $\Delta G_{ads}$  is the adsorption free energy of adsorbates, and  $\Delta E_{ZPE}$  and  $\Delta S$  are the difference of  $E_{ZPE}$  and  $S$ , respectively. The free energy of O<sub>2</sub> was computed by the equation:

$$G_{O_2} = 2G_{H_2O} - 2G_{H_2} - 4.92 \text{ eV} \quad (6)$$

### The calculation of energy in volcano plots

The free energies for the four steps in dissociative mechanism can be defined as:

$$\Delta G_1 = G_{(O+OH)^*} - G_{(O+O)^*} - G_{(H^++e^-)} = \Delta G_{(O+OH)^*} - \Delta G_{(O+O)^*} \quad (7)$$

$$\Delta G_2 = G_{O^*} + G_{H_2O} - G_{(O+OH)^*} - G_{(H^++e^-)} = \Delta G_{O^*} - \Delta G_{(O+OH)^*} \quad (8)$$

$$\Delta G_3 = G_{OH^*} - G_{O^*} - G_{(H^++e^-)} = \Delta G_{OH^*} - \Delta G_{O^*} \quad (9)$$

$$\Delta G_4 = G^* + G_{H_2O} - G_{OH^*} - G_{(H^++e^-)} = -\Delta G_{OH^*} \quad (10)$$

The relations between OH and other adsorbates can be used to define the limiting potentials in dissociative mechanism as a function of the OH adsorption energy as:

$$U_{L1} = -\Delta G_1 = -0.2 \Delta G_{OH^*} + 1.6 \quad (11)$$

$$U_{L2} = -\Delta G_2 = 1.7 \Delta G_{OH^*} - 0.6 \quad (12)$$

$$U_{L3} = -\Delta G_3 = -1.2 \Delta G_{OH^*} + 2.1 \quad (13)$$

$$U_{L4} = -\Delta G_4 = \Delta G_{OH^*} \quad (14)$$

The free energies for the four steps in associative mechanism can be defined as:

$$\Delta G_1 = G_{OOH^*} - G_{O_2} - G_* - G_{(H^+ + e^-)} = \Delta G_{OOH^*} - 4.92 \quad (15)$$

$$\Delta G_2 = G_{O^*} + G_{H_2O} - G_{OOH^*} - G_{(H^+ + e^-)} = \Delta G_{O^*} - \Delta G_{OOH^*} \quad (16)$$

$$\Delta G_3 = G_{OH^*} - G_{O^*} - G_{(H^+ + e^-)} = \Delta G_{OH^*} - \Delta G_{O^*} \quad (17)$$

$$\Delta G_4 = G_* + G_{H_2O} - G_{OH^*} - G_{(H^+ + e^-)} = -\Delta G_{OH^*} \quad (18)$$

The relations between OH and other adsorbates can be used to define the limiting potentials in associative mechanism as a function of the OH adsorption energy as:

$$U_{L1} = -\Delta G_1 = -\Delta G_{OH^*} + 1.6 \quad (19)$$

$$U_{L2} = -\Delta G_2 = 1.2 \Delta G_{OH^*} + 1.2 \quad (20)$$

$$U_{L3} = -\Delta G_3 = -1.2 \Delta G_{OH^*} + 2.1 \quad (21)$$

$$U_{L4} = -\Delta G_4 = \Delta G_{OH^*} \quad (22)$$

The above equations result in four limiting potential lines for the four elementary steps, which could form the volcano plot.

## Geometric and Electronic Properties

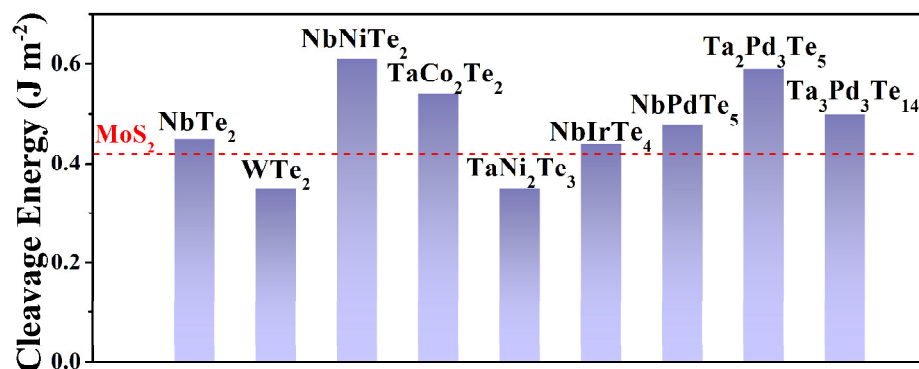

**Figure S1.** The calculated cleavage energies of studied 9 monolayer tellurides.

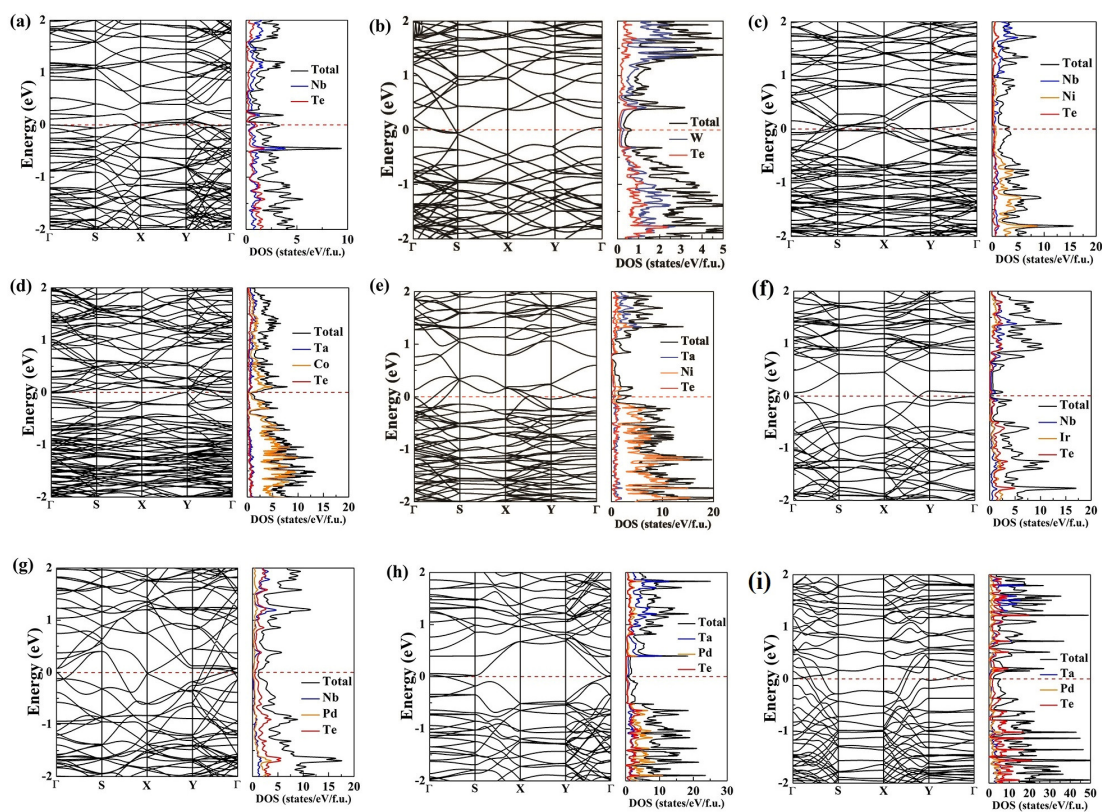

**Figure S2.** Band structure and density of states (DOS) of monolayer (a) NbTe<sub>2</sub>, (b) WTe<sub>2</sub>, (c) NbNiTe<sub>2</sub>, (d) TaCo<sub>2</sub>Te<sub>2</sub>, (e) TaNi<sub>2</sub>Te<sub>3</sub>, (f) NbIrTe<sub>4</sub>, (g) NbPdTe<sub>5</sub>, (h) Ta<sub>2</sub>Pd<sub>3</sub>Te<sub>5</sub>, and (i) Ta<sub>3</sub>Pd<sub>3</sub>Te<sub>14</sub>. NbIrTe<sub>4</sub> is semi-metallic with zero band-gap and others are metallic.

## Origin of O<sub>2</sub> activation

The O<sub>2</sub> adsorption configurations, energy barriers of O<sub>2</sub> dissociation, and the analysis of underlying O<sub>2</sub> adsorption mechanism are shown in this part.

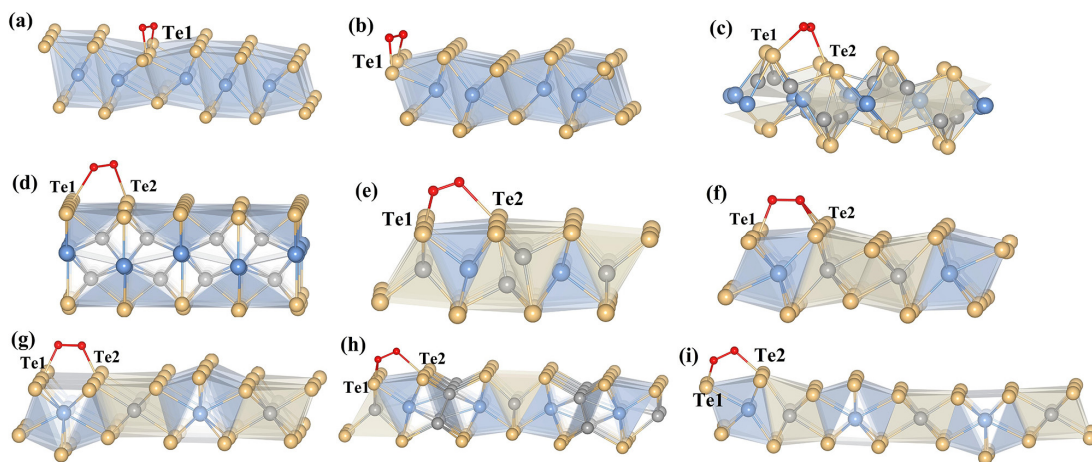

**Figure S3.** The O<sub>2</sub> adsorption configurations of (a) NbTe<sub>2</sub>, (b) WTe<sub>2</sub>, (c) NbNiTe<sub>2</sub>, (d) TaCo<sub>2</sub>Te<sub>2</sub>, (e) TaNi<sub>2</sub>Te<sub>3</sub>, (f) NbIrTe<sub>4</sub>, (g) NbPdTe<sub>5</sub>, (h) Ta<sub>2</sub>Pd<sub>3</sub>Te<sub>5</sub>, and (i) Ta<sub>3</sub>Pd<sub>3</sub>Te<sub>14</sub>.

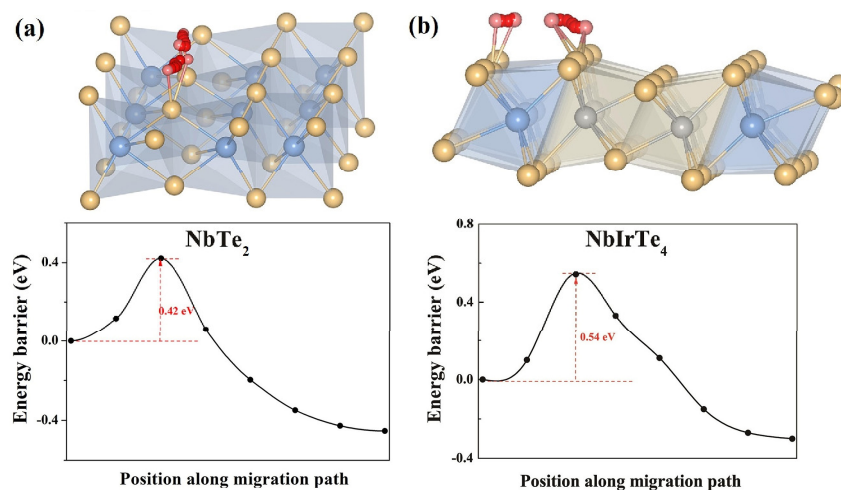

**Figure S4.** The energy barriers of O<sub>2</sub> dissociation in monolayer (a) NbTe<sub>2</sub> and (b) NbIrTe<sub>4</sub> from NEB calculations.

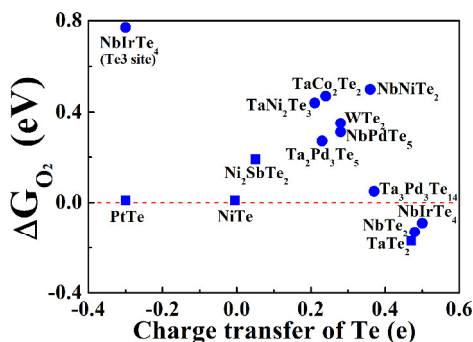

**Figure S5.** The O<sub>2</sub> adsorption energy of studied tellurides versus charge transfer. The Te active sites are Te1 atoms that mainly interact with O<sub>2</sub> with stronger bonding strength. The previous studied tellurides PtTe, NiTe, TaTe<sub>2</sub>, and Ni<sub>2</sub>SbTe<sub>2</sub> have also been considered for comparison.<sup>6-9</sup> Notably, the O<sub>2</sub> adsorption energy of NiTe was recalculated in this study and the details of the calculation of NiTe are shown in Table S7.

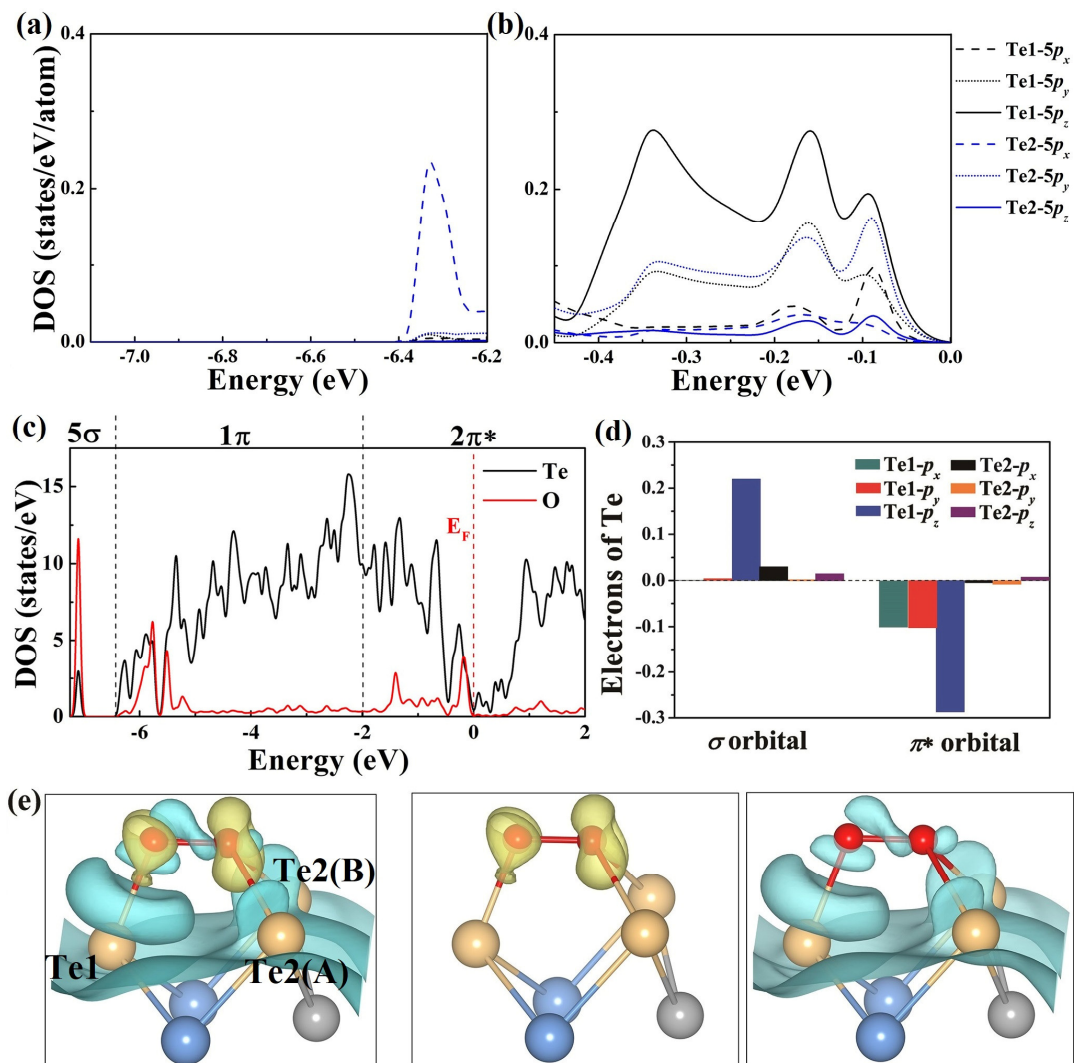

**Figure S6.** pDOS of Te1 and Te2 atoms in NbIrTe<sub>4</sub> (a) from -7.2 to -6.2 eV and (b) from -0.2 to 0 eV. (c) DOS of Te and O elements with orbitals of O<sub>2</sub> marked on the top and (d) integrated electrons of the difference of pDOS of Te1 and Te2 between NbIrTe<sub>4</sub> and O<sub>2</sub>-adsorbed NbIrTe<sub>4</sub>. Notably, the orbitals here are O<sub>2</sub> that has adsorbed on NbIrTe<sub>4</sub>. (e) Differential charge density distributions of O<sub>2</sub> adsorbed NbIrTe<sub>4</sub>.

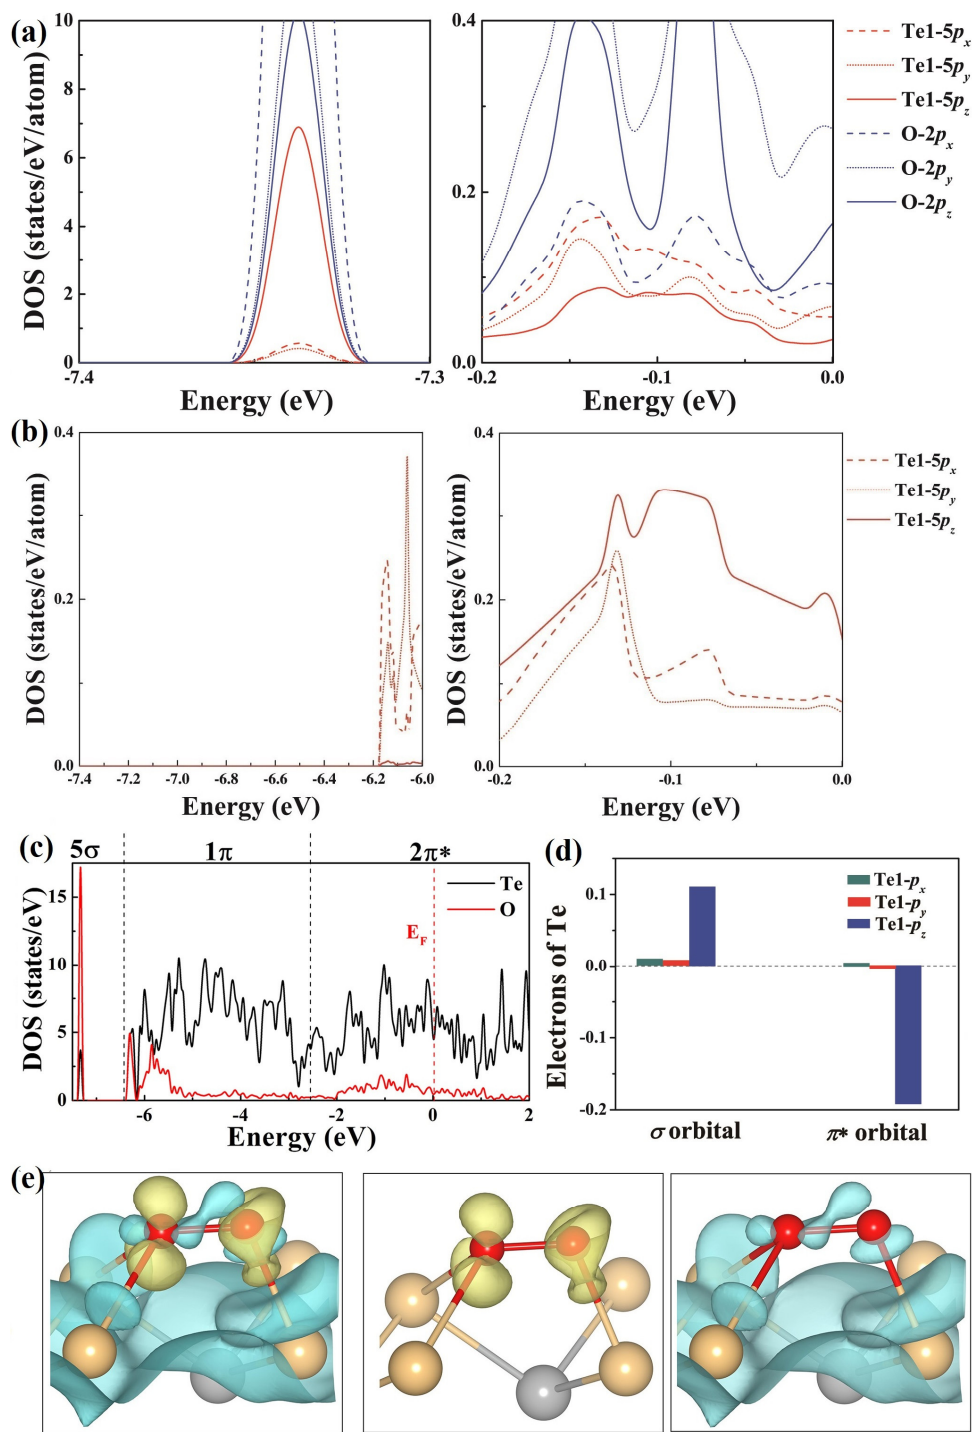

**Figure S7.** (a) pDOS of Te1 and O atoms in O<sub>2</sub> adsorbed PtTe and (b) Te atoms in PtTe. (c) DOS of Te and O elements with orbitals of O<sub>2</sub> marked on the top (d) integrated electrons of the difference of pDOS between PtTe and O<sub>2</sub> adsorbed PtTe. Notably, the orbitals here are O<sub>2</sub> that has adsorbed on PtTe. (e) Differential Charge density distributions of O<sub>2</sub> on PtTe monolayer.

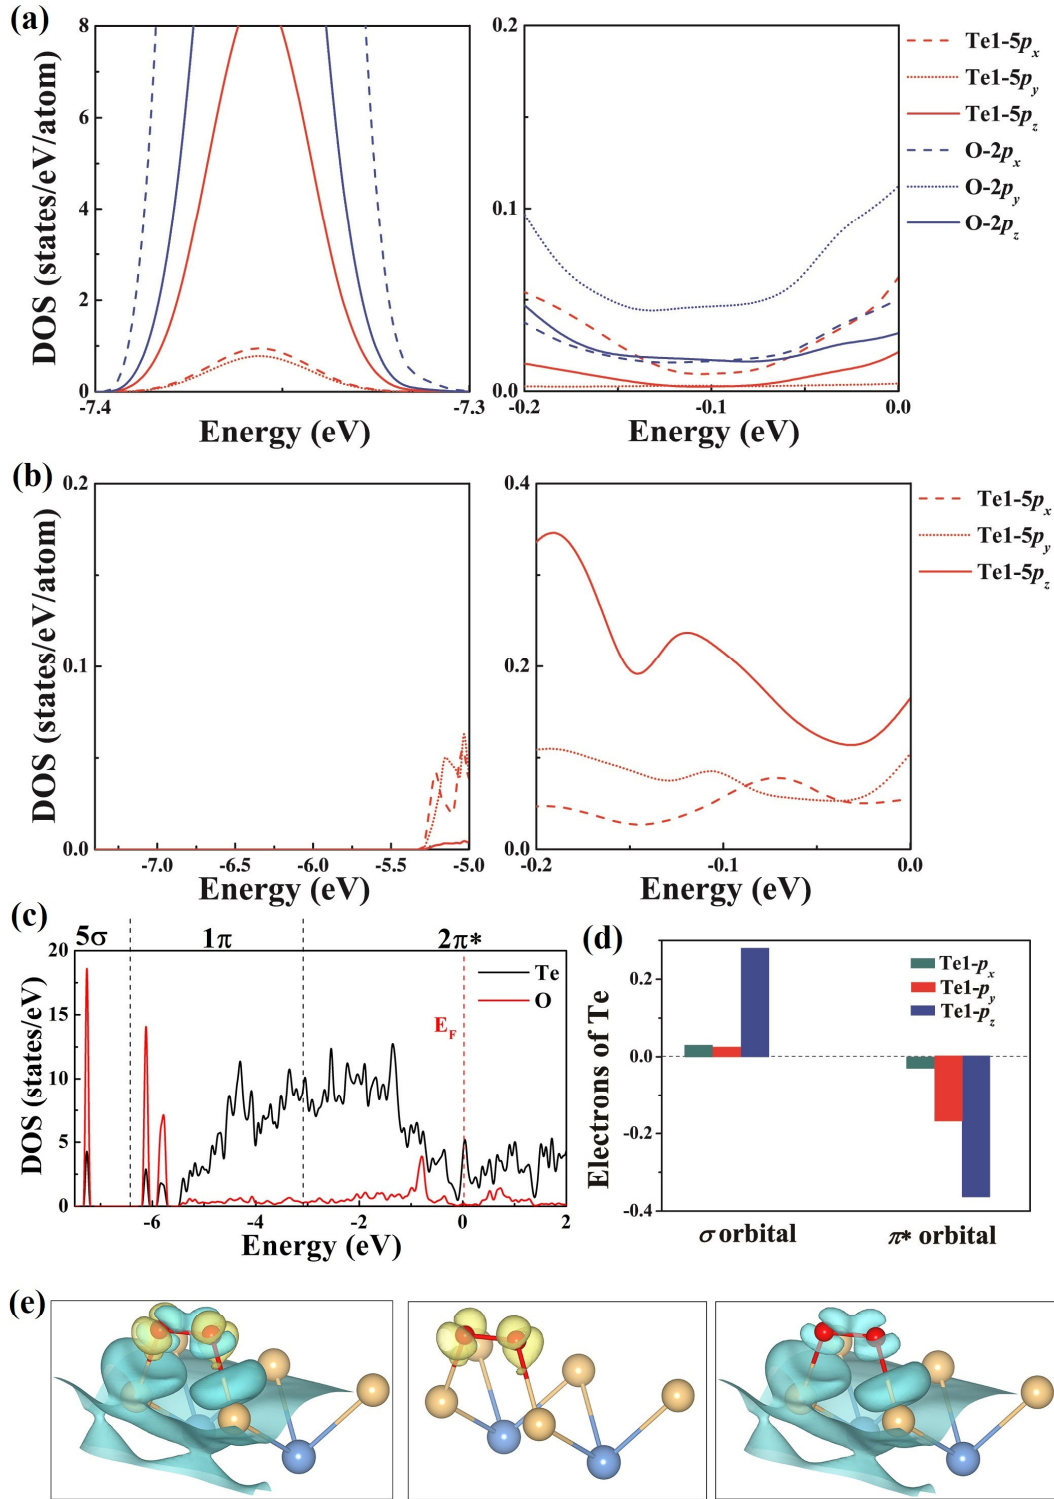

**Figure S8.** (a) pDOS of Te1 and O atoms in O<sub>2</sub> adsorbed NbTe<sub>2</sub> and (b) Te atoms in NbTe<sub>2</sub>. (c) DOS of Te and O elements with orbitals of O<sub>2</sub> marked on the top (d) integrated electrons of the difference of pDOS between NbTe<sub>2</sub> and O<sub>2</sub> adsorbed NbTe<sub>2</sub>. Notably, the orbitals here are O<sub>2</sub> that has adsorbed on NbTe<sub>2</sub>. (e) Differential Charge density distributions of O<sub>2</sub> on NbTe<sub>2</sub> monolayer.

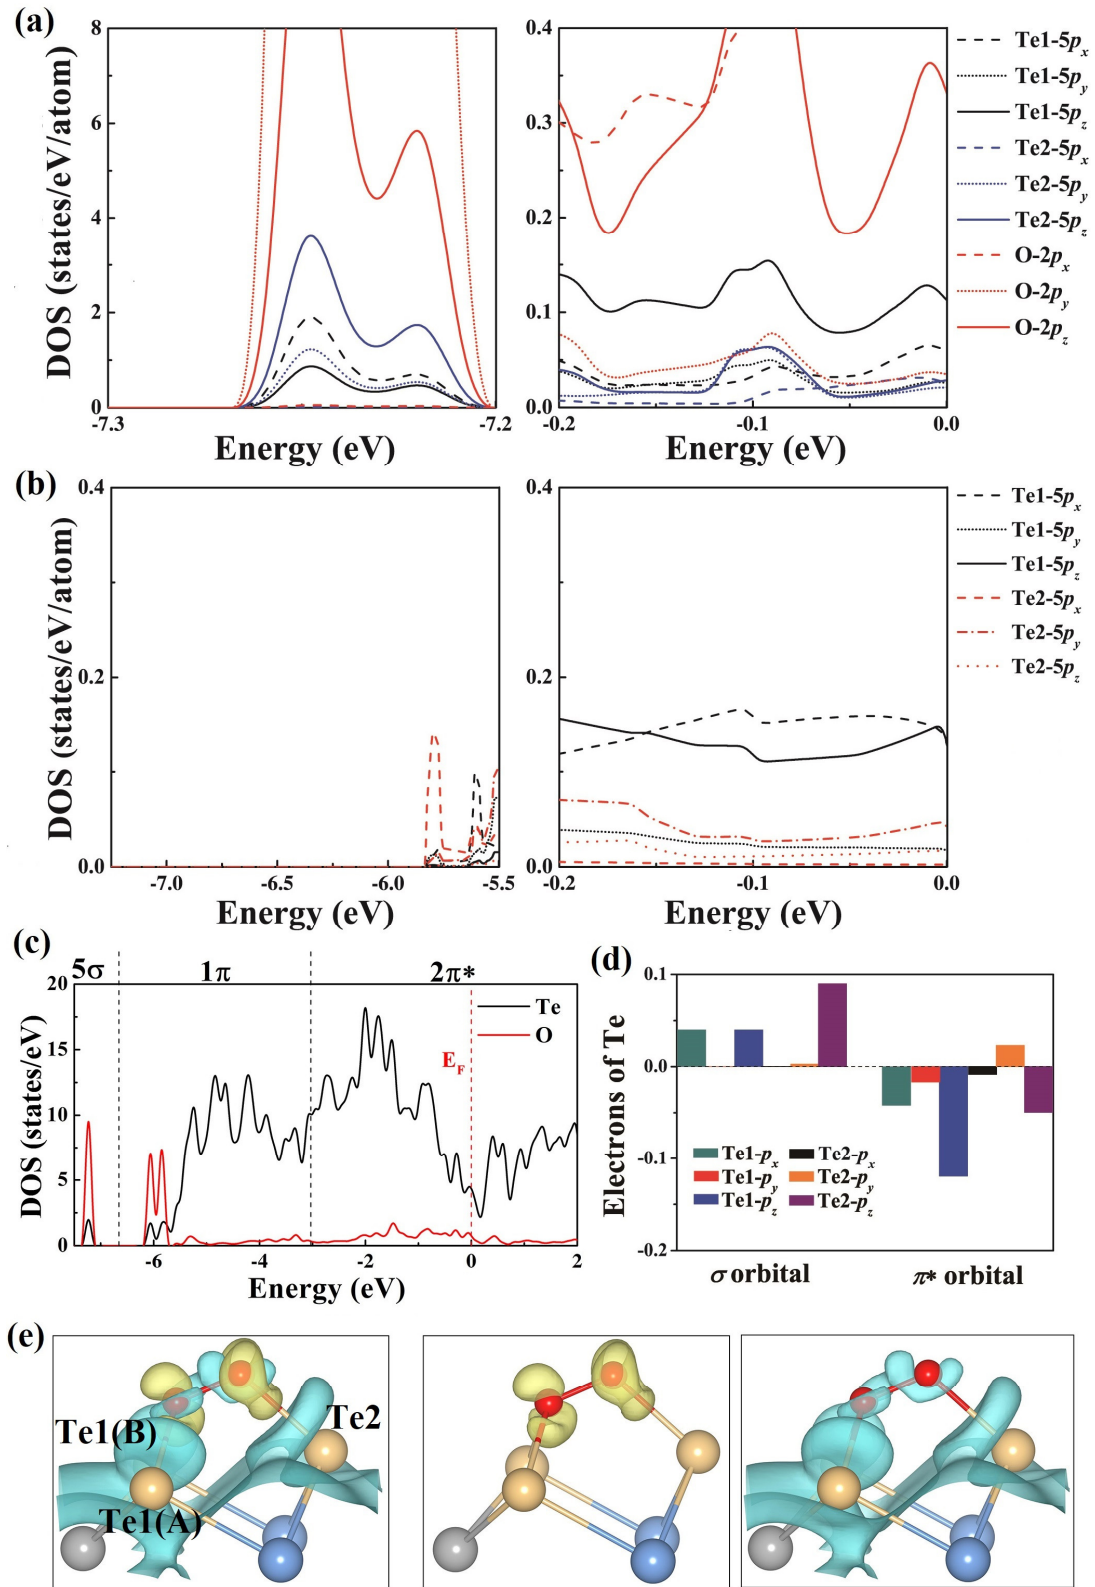

**Figure S9.** (a) pDOS of Te1, Te2 and O atoms in O<sub>2</sub>-adsorbed Ta<sub>3</sub>Pd<sub>3</sub>Te<sub>14</sub> and (b) Ta<sub>3</sub>Pd<sub>3</sub>Te<sub>14</sub>. (c) DOS of Te and O elements with orbitals of O<sub>2</sub> marked on the top (d) integrated electrons of the difference of pDOS between Ta<sub>3</sub>Pd<sub>3</sub>Te<sub>14</sub> and O<sub>2</sub>-adsorbed Ta<sub>3</sub>Pd<sub>3</sub>Te<sub>14</sub>. Notably, the orbitals here are O<sub>2</sub> that has adsorbed on Ta<sub>3</sub>Pd<sub>3</sub>Te<sub>14</sub>. (e) Differential Charge density distributions of O<sub>2</sub> on Ta<sub>3</sub>Pd<sub>3</sub>Te<sub>14</sub> monolayer.

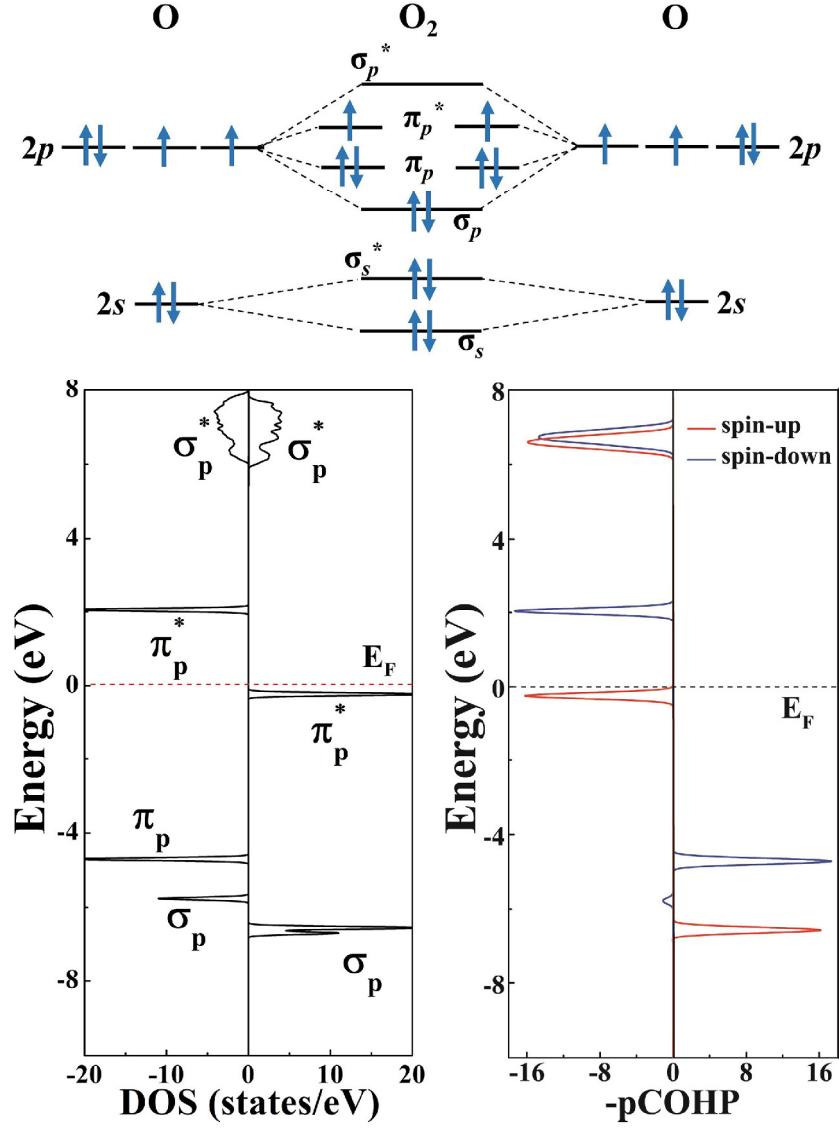

**Figure S10.** Schematic representation for O<sub>2</sub> molecule and calculated DOS and pCOHP curves.

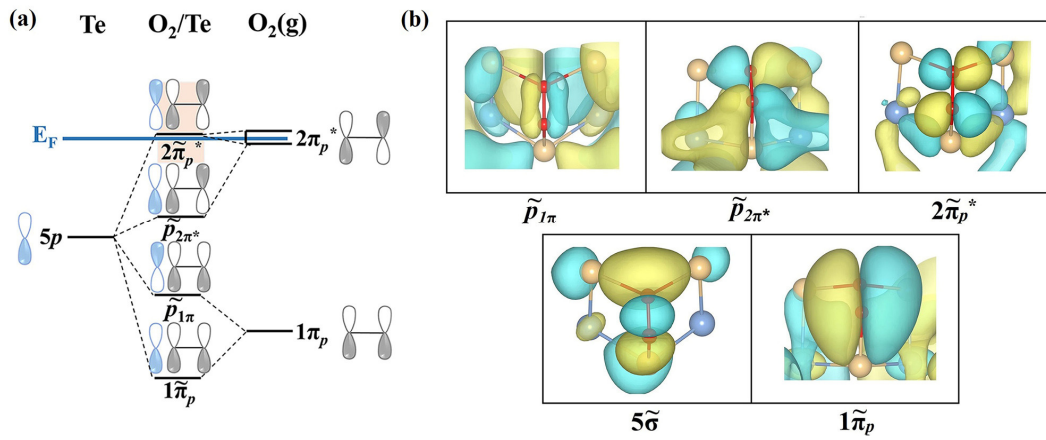

**Figure S11.** (a) Schematic representation of  $\pi$  interactions and (b) the  $5\tilde{\sigma}$ ,  $1\tilde{\pi}_p$ ,  $\tilde{p}_{1\pi}$ ,  $\tilde{p}_{2\pi^*}$ , and  $2\tilde{\pi}_p^*$  orbitals for O<sub>2</sub> adsorbed on NbIrTe<sub>4</sub>. Notably,  $5\tilde{\sigma}$  contributes to the “donation” and  $\tilde{p}_{2\pi^*}$  and  $2\tilde{\pi}_p^*$  contributes to “back-donation” process.

## ORR catalytic performance and linear scaling

The configurations and the free energy diagrams for monolayer NbTe<sub>2</sub>, NbIrTe<sub>4</sub>, and Ta<sub>3</sub>Pd<sub>3</sub>Te<sub>14</sub>, the structural, electronic, and catalytic properties of NbIrTe<sub>4</sub> multilayers, and the relationship between  $\Delta G_{O^*}$  and  $\Delta G_{OH^*}$  are shown in this part.

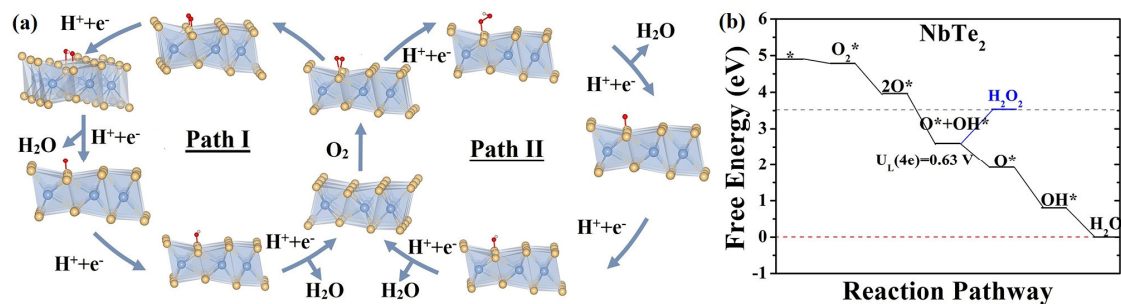

**Figure S12.** (a) Scheme of the possible two ORR reaction pathways and (b) free energy diagram for the associative ORR pathway on monolayer NbTe<sub>2</sub>.

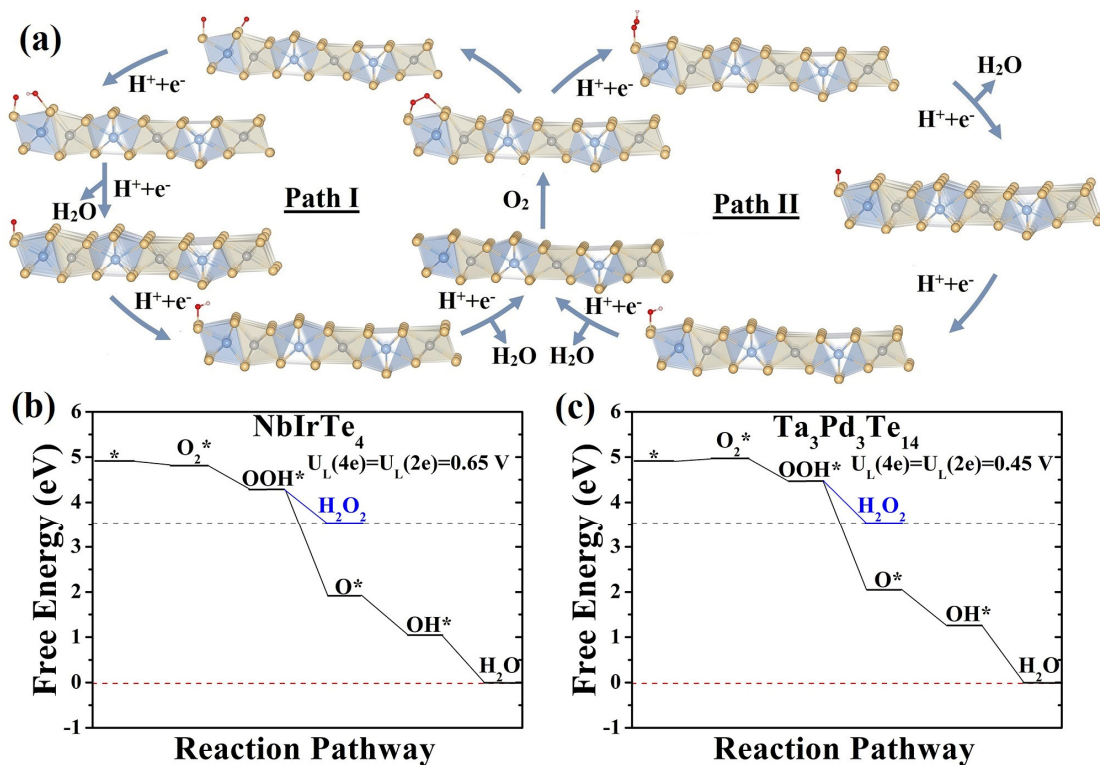

**Figure S13.** (a) Scheme of the possible two ORR reaction pathways monolayer Ta<sub>3</sub>Pd<sub>3</sub>Te<sub>14</sub>, and free energy diagrams for the associative ORR pathway on monolayer (b) NbIrTe<sub>4</sub> and (c) Ta<sub>3</sub>Pd<sub>3</sub>Te<sub>14</sub> at U=0 V.

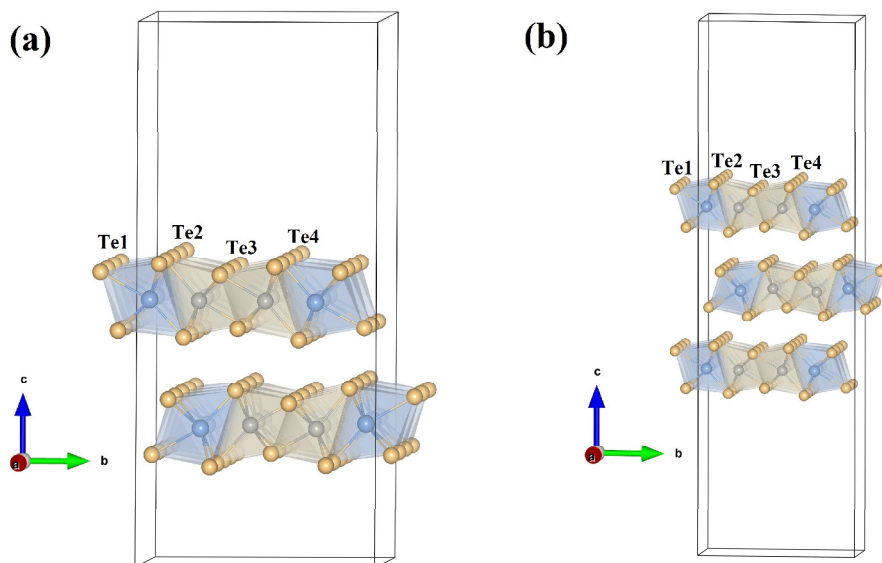

**Figure S14.** The structures of (a) bilayer and (b) trilayer NbIrTe<sub>4</sub>.

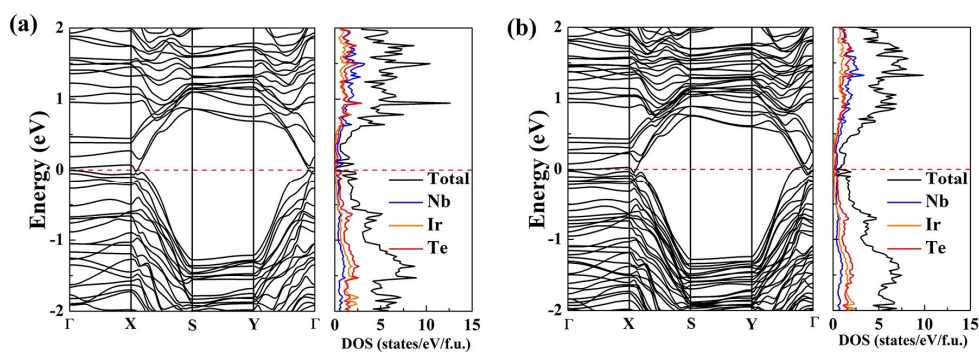

**Figure S15.** Band structure and density of states (DOS) of (a) bilayer and (b) trilayer NbIrTe<sub>4</sub>.

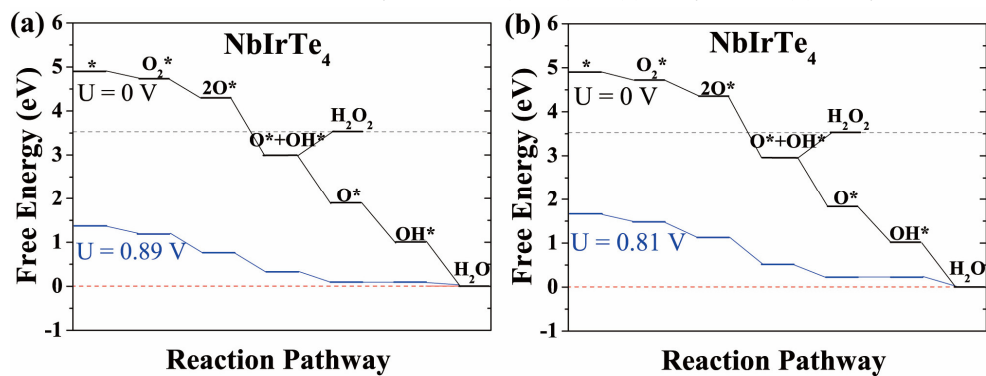

**Figure S16.** Free energy diagrams for the dissociative ORR pathway on (a) bilayer and (b) trilayer NbIrTe<sub>4</sub>.

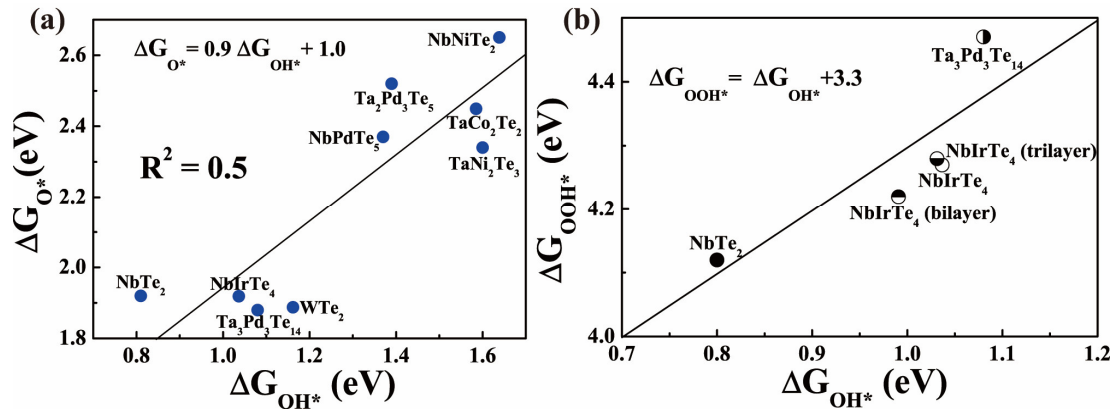

**Figure S17.** (a) The Variation of  $\Delta G_{O^*}$  versus  $\Delta G_{OH^*}$  in studied 9 tellurides. (b) Variation of  $\Delta G_{OOH^*}$  as a function of  $\Delta G_{OH^*}$  in newly found promising telluride catalysts. We here determined the limiting potentials:  $U_L = \min\{-\Delta G_1, -\Delta G_2, -\Delta G_3, -\Delta G_4\}$ , where  $\Delta G_1, \Delta G_2, \Delta G_3$ , and  $\Delta G_4$  are the free energy of four reaction steps. With the scaling relations between OH\* and other adsorbates, the limiting potential of dissociation pathway can be given by equation:

$$U_L = \min\{-0.2 \Delta G_{OH^*} + 1.2, 1.9 \Delta G_{OH^*} - 0.9, -1.3 \Delta G_{OH^*} + 2.2, \Delta G_{OH^*}\}$$

Thus the estimated highest limiting potentials for dissociation pathway is 0.94 V.

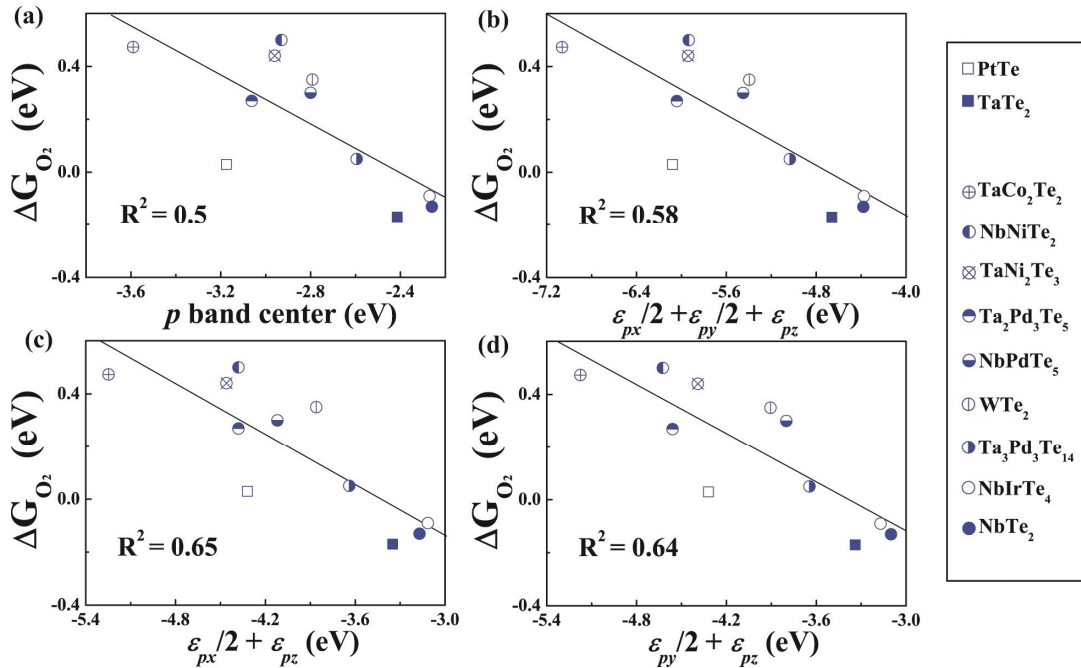

**Figure S18.** O<sub>2</sub> adsorption energy versus other considered descriptors of (a)  $p$  band center, (b)  $\varepsilon_{px}/2 + \varepsilon_{py}/2 + \varepsilon_{pz}$ , (c)  $\varepsilon_{px}/2 + \varepsilon_{pz}$ , and (d)  $\varepsilon_{py}/2 + \varepsilon_{pz}$ , where  $\varepsilon_{px}, \varepsilon_{py}$ , and  $\varepsilon_{pz}$  defines centroid of the projected density of states of the  $p_x, p_y$ , and  $p_z$  orbitals relative to the Fermi level. The correlation coefficient  $R^2$  of other descriptors are smaller than that of  $\varepsilon_{pz}$ .

## Rational screening of activity descriptor

The calculated cleavage energies and ORR pathways of newly studied monolayer tellurides, and the analysis of the adsorption energies of oxygen-containing groups are shown here.

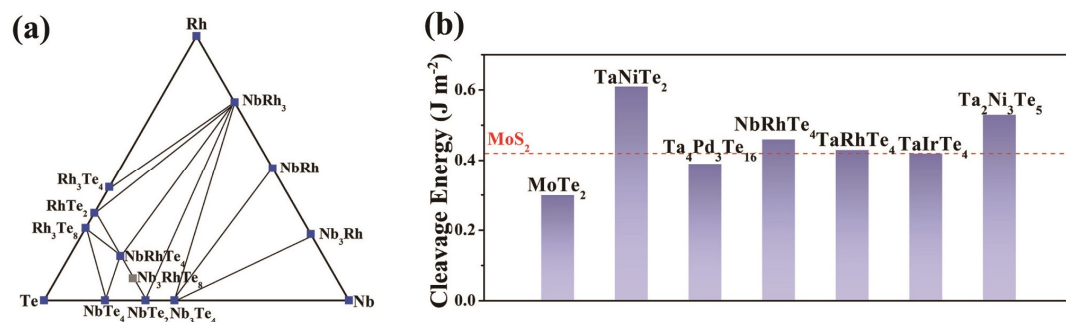

**Figure S19.** (a) The calculated cleavage energies of newly studied monolayer tellurides. (b) The calculated phase diagram of Nb-Rh-Te system.

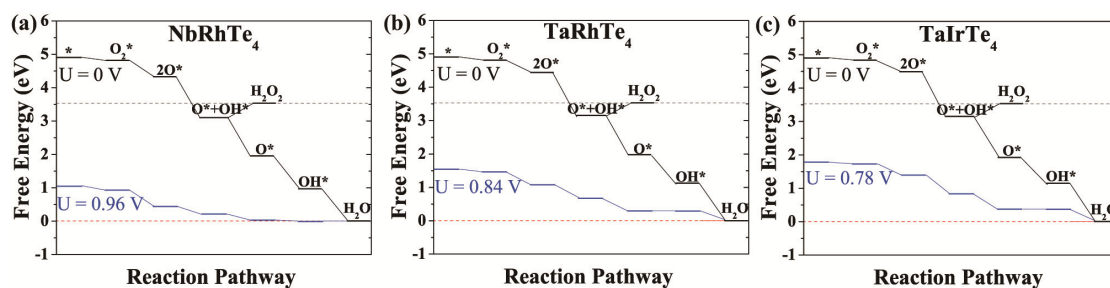

**Figure S20.** Free energy diagrams for the dissociative ORR pathway on monolayer (a)  $\text{NbRhTe}_4$ , (b)  $\text{TaRhTe}_4$ , and (c)  $\text{TaIrTe}_4$ .

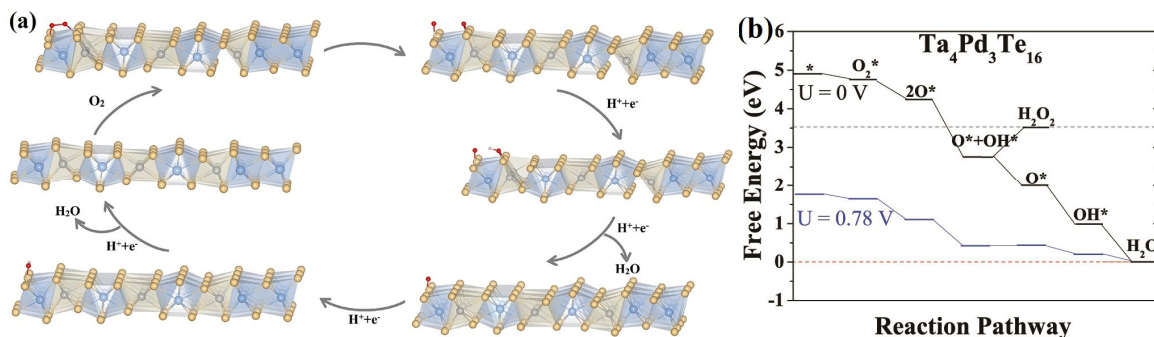

**Figure S21.** (a) Scheme of the dissociation reaction pathway and (b) free energy diagrams for the dissociative ORR pathway on monolayer  $\text{Ta}_4\text{Pd}_3\text{Te}_{16}$ .

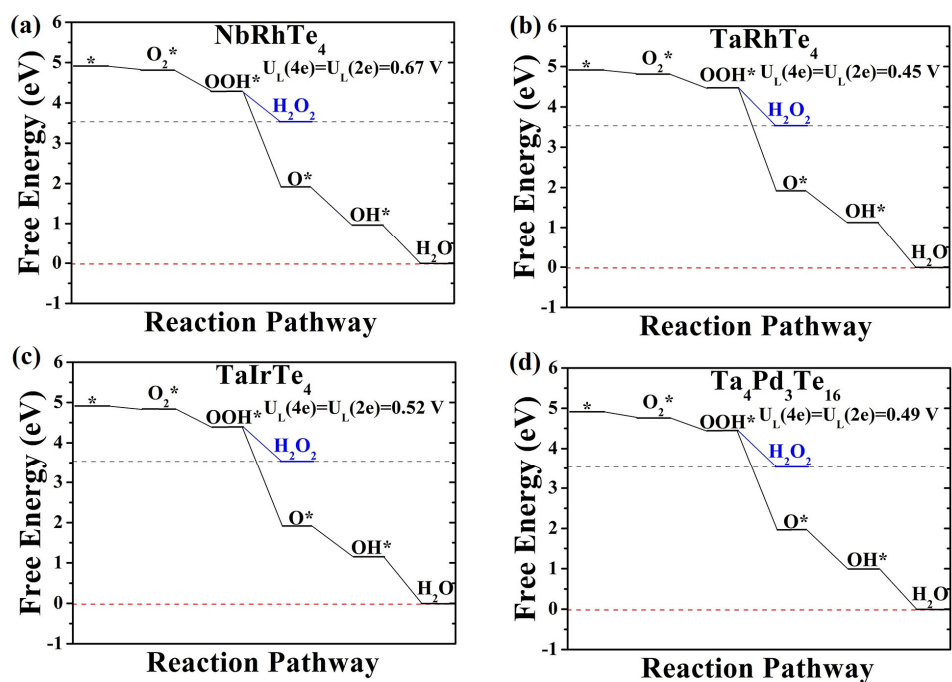

**Figure S22.** Free energy diagrams for the associative ORR pathway on monolayer (a) NbRhTe<sub>4</sub>, (b) TaRhTe<sub>4</sub>, (c) TaIrTe<sub>4</sub>, and (d) Ta<sub>4</sub>Pd<sub>3</sub>Te<sub>16</sub>.

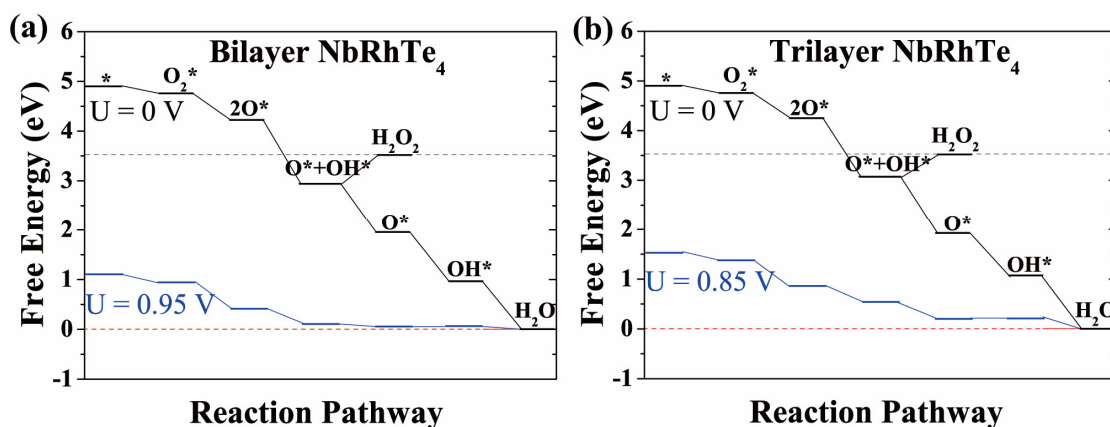

**Figure S23.** Free energy diagrams for the dissociative ORR pathway on (a) bilayer and (b) trilayer NbRhTe<sub>4</sub>.

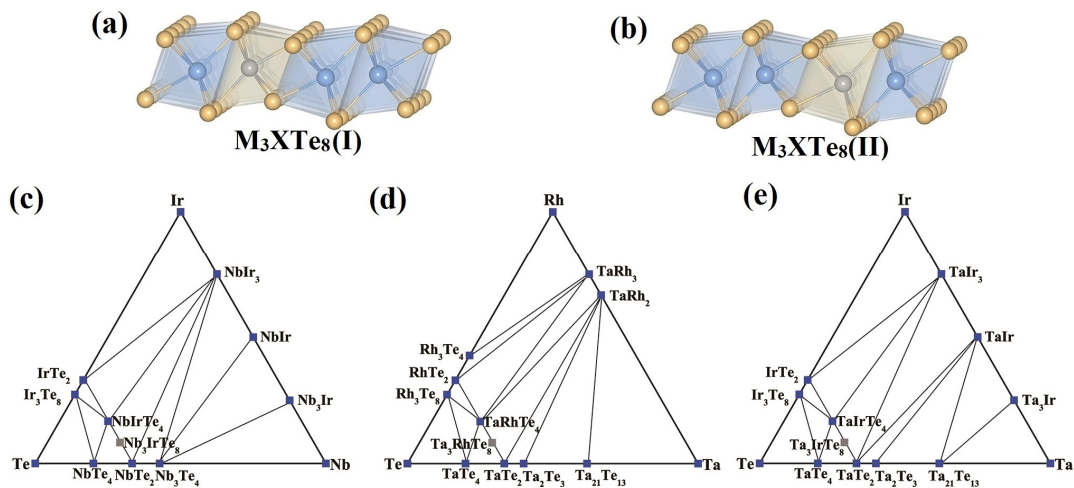

**Figure S24.** The structures of (a)  $M_3XTe_8(I)$  and (b)  $M_3XTe_8(II)$  and the phase diagrams of (c) Nb-Ir-Te, (d) Ta-Rh-Te, and (e) Ta-Ir-Te systems. The calculated formation energies of the bulk phases of hypothetical  $Nb_3RhTe_8$ ,  $Nb_3IrTe_8$ ,  $Ta_3RhTe_8$ ,  $Ta_3IrTe_8$  were 20, 24, 20, and 25 meV/atom, respectively. The phase diagram of Nb-Rh-Te system was shown in Figure S19.

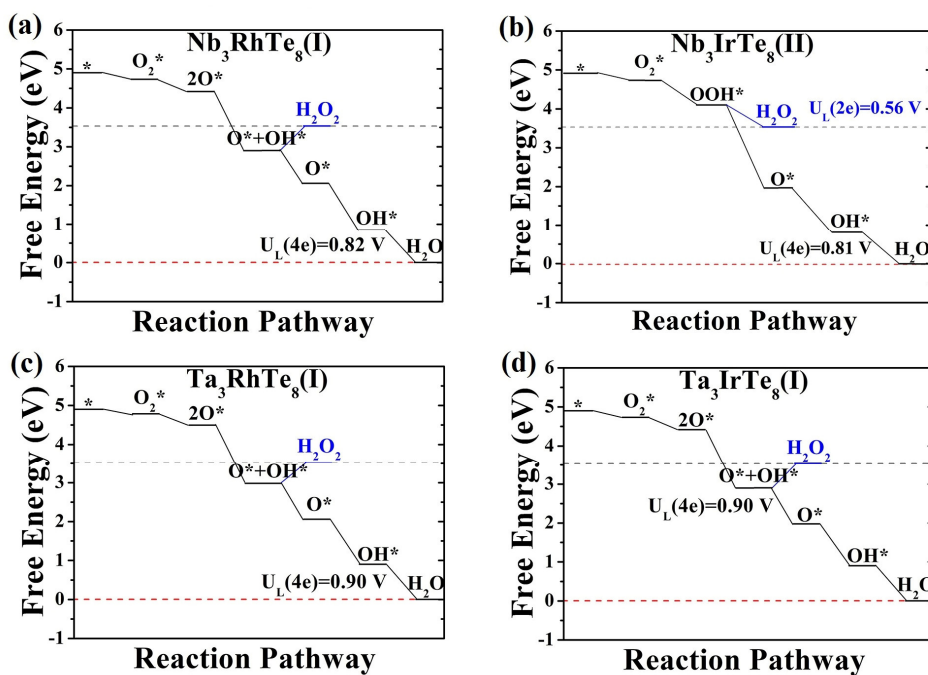

**Figure S25.** Free energy diagrams for the dissociative ORR pathway on monolayer (a)  $Nb_3RhTe_8(I)$ , (c)  $Ta_3RhTe_8(I)$  and (d)  $Ta_3IrTe_8(I)$  and the associative ORR pathway on monolayer (b)  $Nb_3IrTe_8(II)$ .

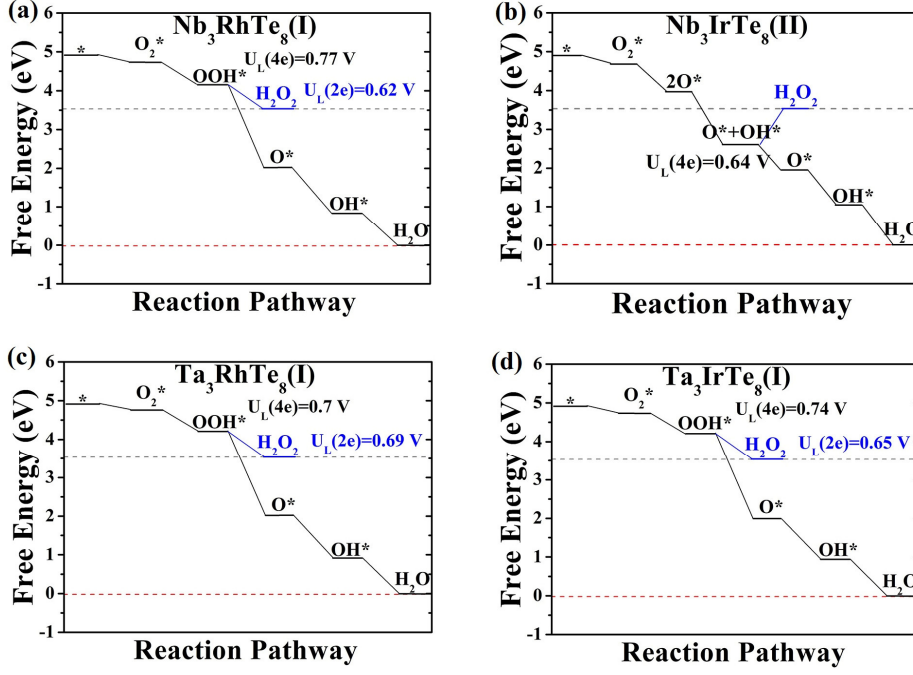

**Figure S26.** Free energy diagrams for the associative ORR pathway on monolayer (a) Nb<sub>3</sub>RhTe<sub>8</sub>(I), (c) Ta<sub>3</sub>RhTe<sub>8</sub>(I) and (d) Ta<sub>3</sub>IrTe<sub>8</sub>(I) and the dissociative pathway on monolayer (b) Nb<sub>3</sub>IrTe<sub>8</sub>(II).

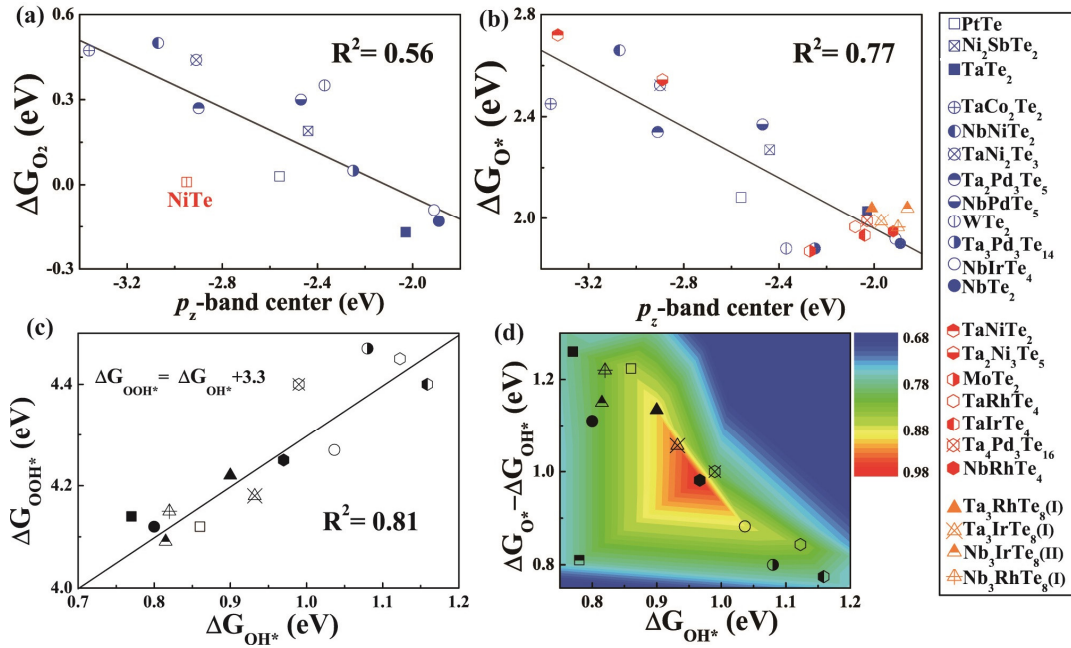

**Figure S27.** (a) O<sub>2</sub> adsorption energy versus the average  $p_z$ -band center of Te atoms for initially studied tellurides. Notably, the  $\Delta G_{O_2}$  of NiTe was recalculated in this study and the details of the calculation are shown in Table S7. The  $\Delta G_{O_2}$  of NiTe can't accord with the linear relationship, which might attract more attention in subsequent study. (b) The  $\Delta G_O$  versus the  $p_z$ -band center of active Te sites for all studied tellurides. (c) Variation of  $\Delta G_{OOH^*}$  as a function of  $\Delta G_{OH^*}$  for monolayer tellurides. (d) Catalytic activity of the materials as a function of intermediates formation free energies  $\Delta G_{O^*} - \Delta G_{OH^*}$  and  $\Delta G_{OH^*}$ . The circle, star, triangle, and square points represent initially-studied tellurides, newly-studied tellurides, M-doped variants, and known catalysts in other studies, respectively.

**Table S1.** Bader charge calculation results of charge transfer in monolayer tellurides.

|                                                    | <b>M</b> | <b>X</b>          | <b>Te1</b> | <b>Te2</b> | <b>Te3</b> | <b>Te4</b> | <b>Te5</b> | <b>Te6</b> | <b>Te7</b> | <b>Te8</b> |
|----------------------------------------------------|----------|-------------------|------------|------------|------------|------------|------------|------------|------------|------------|
|                                                    | (e)      | (e)               | (e)        | (e)        | (e)        | (e)        | (e)        | (e)        | (e)        | (e)        |
| <b>NbTe<sub>2</sub></b>                            | -0.95    |                   | 0.48       | 0.5        | 0.5        |            |            |            |            |            |
| <b>WTe<sub>2</sub></b>                             | -0.48    |                   | 0.28       | 0.19       |            |            |            |            |            |            |
| <b>NbNiTe<sub>2</sub></b>                          | -1.03    | 0.29              | 0.36       | 0.37       |            |            |            |            |            |            |
| <b>TaCo<sub>2</sub>Te<sub>2</sub></b>              | -1.12    | 0.4               | 0.24       | 0.02       | 0.12       |            |            |            |            |            |
| <b>TaNi<sub>2</sub>Te<sub>3</sub></b>              | -1.15    | X1 0.1<br>X2 0.26 | 0.32       | 0.24       | 0.21       |            |            |            |            |            |
| <b>NbIrTe<sub>4</sub></b>                          | -1.15    | 0.58              | 0.50       | 0.07       | -0.29      | 0.28       |            |            |            |            |
| <b>NbPdTe<sub>5</sub></b>                          | -1.14    | 0.27              | 0.28       | 0.21       | 0.02       | 0.32       | 0.02       |            |            |            |
| <b>Ta<sub>2</sub>Pd<sub>3</sub>Te<sub>5</sub></b>  | -1.22    | 0.43              | 0.24       | 0.23       | 0.23       |            |            |            |            |            |
| <b>Ta<sub>3</sub>Pd<sub>3</sub>Te<sub>14</sub></b> | -1.15    | 0.26              | 0.10       | 0.37       | 0.01       | 0.31       | 0.07       | 0.23       | 0.25       |            |
| <b>MoTe<sub>2</sub></b>                            | -0.44    |                   | 0.25       | 0.17       |            |            |            |            |            |            |
| <b>TaNiTe<sub>2</sub></b>                          | -1.01    | 0.31              | 0.34       | 0.35       |            |            |            |            |            |            |
| <b>Ta<sub>4</sub>Pd<sub>3</sub>Te<sub>16</sub></b> | -1.15    | 0.29              | 0.47       | 0.18       | 0.21       | 0.28       | 0.05       | 0.31       | -0.03      | 0.35       |
| <b>NbRhTe<sub>4</sub></b>                          | -1.13    | 0.38              | 0.49       | 0.14       | -0.24      | 0.33       |            |            |            |            |
| <b>TaRhTe<sub>4</sub></b>                          | -1.12    | 0.38              | 0.47       | 0.15       | -0.24      | 0.32       |            |            |            |            |
| <b>TaIrTe<sub>4</sub></b>                          | -1.14    | 0.60              | 0.48       | 0.07       | -0.30      | 0.27       |            |            |            |            |
| <b>Ta<sub>2</sub>Ni<sub>3</sub>Te<sub>5</sub></b>  | -1.15    | 0.22              | 0.38       | 0.26       | 0.33       |            |            |            |            |            |

**Table S2.** Bader charge results of charge transfer and bond length of O<sub>2</sub>-adsorbed tellurides.

| <b>Charge</b>                                      | <b>Te1 (e)</b>                 | <b>Te2 (e)</b>                 | <b>O<sub>1</sub> (e)</b>               | <b>O<sub>2</sub> (e)</b> |
|----------------------------------------------------|--------------------------------|--------------------------------|----------------------------------------|--------------------------|
| <b>NbTe<sub>2</sub></b>                            | -0.42                          | -0.41                          | 0.40                                   | 0.39                     |
| <b>NbIrTe<sub>4</sub></b>                          | -0.56                          | Te2 (A) -0.15<br>Te2 (B) -0.14 | 0.44                                   | 0.43                     |
| <b>Ta<sub>3</sub>Pd<sub>3</sub>Te<sub>14</sub></b> | Te1 (A) -0.35<br>Te1 (B) -0.28 | -0.33                          | 0.44                                   | 0.43                     |
| <b>Ta<sub>4</sub>Pd<sub>3</sub>Te<sub>16</sub></b> | -0.53                          | Te2 (A) -0.28<br>Te2 (B) -0.12 | 0.52                                   | 0.31                     |
| <b>NbRhTe<sub>4</sub></b>                          | -0.54                          | Te2 (A) -0.25<br>Te2 (B) -0.18 | 0.46                                   | 0.38                     |
| <b>TaRhTe<sub>4</sub></b>                          | -0.55                          | Te2 (A) -0.25<br>Te2 (B) -0.19 | 0.38                                   | 0.47                     |
| <b>TaIrTe<sub>4</sub></b>                          | -0.57                          | Te2 (A) -0.20<br>Te2 (B) -0.18 | 0.38                                   | 0.49                     |
| <b>Bond length</b>                                 | <b>Te1-O (Å)</b>               | <b>Te2-O (Å)</b>               | <b>O<sub>1</sub>-O<sub>2</sub> (Å)</b> |                          |
| <b>NbTe<sub>2</sub></b>                            | 2.22                           | 2.28                           | 1.38                                   |                          |
| <b>NbIrTe<sub>4</sub></b>                          | 2.13                           | 2.56                           | 1.39                                   |                          |
| <b>Ta<sub>3</sub>Pd<sub>3</sub>Te<sub>14</sub></b> | 2.35                           | 2.25                           | 1.37                                   |                          |
| <b>Ta<sub>4</sub>Pd<sub>3</sub>Te<sub>16</sub></b> | 2.15                           | 2.32                           | 1.39                                   |                          |
| <b>NbRhTe<sub>4</sub></b>                          | 2.14                           | 2.43                           | 1.38                                   |                          |
| <b>TaRhTe<sub>4</sub></b>                          | 2.14                           | 2.49                           | 1.39                                   |                          |
| <b>TaIrTe<sub>4</sub></b>                          | 2.13                           | 2.51                           | 1.39                                   |                          |

**Table S3.** The O<sub>2</sub> adsorption energies on different Te sites in studied monolayers

| Adsorption energy (eV)                           | Te1   | Te2  | Te3  | Te4  | Te5  | Te6  | Te7  | Te8  |
|--------------------------------------------------|-------|------|------|------|------|------|------|------|
| Monolayer                                        |       |      |      |      |      |      |      |      |
| NbTe <sub>2</sub>                                | -0.13 | 0.92 | 0.97 |      |      |      |      |      |
| WTe <sub>2</sub>                                 | 0.35  | 0.87 |      |      |      |      |      |      |
| NbNiTe <sub>2</sub>                              | 0.50  | 0.71 |      |      |      |      |      |      |
| TaCo <sub>2</sub> Te <sub>2</sub>                | 0.47  | 1.13 | 1.08 |      |      |      |      |      |
| TaNi <sub>2</sub> Te <sub>3</sub>                | 0.44  | 0.65 | 0.79 |      |      |      |      |      |
| NbIrTe <sub>4</sub>                              | -0.09 | 0.82 | 0.73 | 0.94 |      |      |      |      |
| NbPdTe <sub>5</sub>                              | 0.31  | 0.46 | 0.42 | 0.93 | 0.43 |      |      |      |
| Ta <sub>2</sub> Pd <sub>3</sub> Te <sub>5</sub>  | 0.27  | 0.84 | 0.91 |      |      |      |      |      |
| Ta <sub>3</sub> Pd <sub>3</sub> Te <sub>14</sub> | 0.05  | 0.87 | 0.75 | 0.39 | 0.41 | 0.82 | 0.33 |      |
| MoTe <sub>2</sub>                                | 0.27  | 0.85 |      |      |      |      |      |      |
| TaNiTe <sub>2</sub>                              | 0.69  | 1.09 |      |      |      |      |      |      |
| Ta <sub>4</sub> Pd <sub>3</sub> Te <sub>16</sub> | -0.16 | 0.19 | 0.37 | 0.41 | 0.43 | 0.89 | 0.50 | 0.67 |
| NbRhTe <sub>4</sub>                              | -0.11 | 0.86 | 0.52 | 0.87 |      |      |      |      |
| TaRhTe <sub>4</sub>                              | -0.07 | 0.88 | 0.55 | 0.89 |      |      |      |      |
| TaIrTe <sub>4</sub>                              | -0.05 | 0.95 | 0.75 | 0.99 |      |      |      |      |
| Ta <sub>2</sub> Ni <sub>3</sub> Te <sub>5</sub>  | 0.38  | 0.95 | 0.98 |      |      |      |      |      |

**Table S4.** The free energy of four reaction steps, the limiting potential and corresponding overpotential in dissociation pathway

| Monolayer                                        | $\Delta G1$<br>(eV) | $\Delta G2$<br>(eV) | $\Delta G3$<br>(eV) | $\Delta G4$<br>(eV) | Limiting<br>potential (V) | Overpotential<br>(V) |
|--------------------------------------------------|---------------------|---------------------|---------------------|---------------------|---------------------------|----------------------|
| NbTe <sub>2</sub>                                | -1.37               | -0.63               | -1.11               | -0.80               | 0.63                      | 0.60                 |
| NbIrTe <sub>4</sub>                              | -1.25               | -1.24               | -0.88               | -1.04               | 0.88                      | 0.35                 |
| Ta <sub>3</sub> Pd <sub>3</sub> Te <sub>14</sub> | -1.38               | -1.17               | -0.80               | -1.08               | 0.80                      | 0.43                 |
| NbRhTe <sub>4</sub>                              | -1.21               | -1.17               | -0.98               | -0.96               | 0.96                      | 0.27                 |
| TaRhTe <sub>4</sub>                              | -1.26               | -1.22               | -0.84               | -1.12               | 0.84                      | 0.39                 |
| TaIrTe <sub>4</sub>                              | -1.32               | -1.25               | -0.78               | -1.16               | 0.78                      | 0.45                 |
| Ta <sub>4</sub> Pd <sub>3</sub> Te <sub>16</sub> | -1.48               | -0.78               | -1.00               | -0.99               | 0.78                      | 0.45                 |
| Nb <sub>3</sub> RhTe <sub>8</sub> (I)            | -1.49               | -0.86               | -1.22               | -0.82               | 0.82                      | 0.41                 |
| Nb <sub>3</sub> RhTe <sub>8</sub> (II)           | -0.96               | -0.78               | -0.92               | -0.83               | 0.78                      | 0.45                 |
| Nb <sub>3</sub> IrTe <sub>8</sub> (I)            | -1.55               | -0.79               | -1.18               | -0.79               | 0.79                      | 0.44                 |
| Nb <sub>3</sub> IrTe <sub>8</sub> (II)           | -1.37               | -0.64               | -1.15               | -0.81               | 0.64                      | 0.59                 |
| Ta <sub>3</sub> RhTe <sub>8</sub> (I)            | -1.52               | -0.96               | -1.13               | -0.90               | 0.90                      | 0.33                 |
| Ta <sub>3</sub> RhTe <sub>8</sub> (II)           | -1.47               | -0.78               | -1.25               | -0.81               | 0.78                      | 0.45                 |
| Ta <sub>3</sub> IrTe <sub>8</sub> (I)            | -1.53               | -0.90               | -1.05               | -0.93               | 0.90                      | 0.33                 |
| Ta <sub>3</sub> IrTe <sub>8</sub> (II)           | -1.28               | -0.77               | -1.07               | -0.88               | 0.77                      | 0.46                 |

**Table S5.** The free energy of four reaction steps, the limiting potential and corresponding overpotential in association pathway

| Monolayer                                        | $\Delta G1$<br>(eV) | $\Delta G2$<br>(eV) | $\Delta G3$<br>(eV) | $\Delta G4$<br>(eV) | Limiting<br>potential (V) | Overpotential<br>(V) |
|--------------------------------------------------|---------------------|---------------------|---------------------|---------------------|---------------------------|----------------------|
| NbTe <sub>2</sub>                                | -0.80               | -2.21               | -1.11               | -0.80               | 0.80                      | 0.43                 |
| NbIrTe <sub>4</sub>                              | -0.65               | -2.35               | -0.88               | -1.04               | 0.65                      | 0.58                 |
| Ta <sub>3</sub> Pd <sub>3</sub> Te <sub>14</sub> | -0.45               | -2.59               | -0.80               | -1.08               | 0.45                      | 0.78                 |
| NbRhTe <sub>4</sub>                              | -0.67               | -2.31               | -0.98               | -0.96               | 0.67                      | 0.56                 |
| TaRhTe <sub>4</sub>                              | -0.45               | -2.51               | -0.84               | -1.12               | 0.45                      | 0.78                 |
| TaIrTe <sub>4</sub>                              | -0.52               | -2.46               | -0.78               | -1.16               | 0.52                      | 0.71                 |
| Ta <sub>4</sub> Pd <sub>3</sub> Te <sub>16</sub> | -0.49               | -2.44               | -1.00               | -0.99               | 0.49                      | 0.74                 |
| Nb <sub>3</sub> RhTe <sub>8</sub> (I)            | -0.77               | -2.10               | -1.22               | -0.82               | 0.77                      | 0.46                 |
| Nb <sub>3</sub> RhTe <sub>8</sub> (II)           | -0.73               | -2.44               | -0.92               | -0.83               | 0.73                      | 0.50                 |
| Nb <sub>3</sub> IrTe <sub>8</sub> (I)            | -0.98               | -1.97               | -1.18               | -0.79               | 0.79                      | 0.44                 |
| Nb <sub>3</sub> IrTe <sub>8</sub> (II)           | -0.83               | -2.13               | -1.15               | -0.81               | 0.81                      | 0.42                 |
| Ta <sub>3</sub> RhTe <sub>8</sub> (I)            | -0.70               | -2.19               | -1.13               | -0.90               | 0.70                      | 0.53                 |
| Ta <sub>3</sub> RhTe <sub>8</sub> (II)           | -0.79               | -2.07               | -1.25               | -0.81               | 0.79                      | 0.44                 |
| Ta <sub>3</sub> IrTe <sub>8</sub> (I)            | -0.74               | -2.20               | -1.05               | -0.93               | 0.74                      | 0.49                 |
| Ta <sub>3</sub> IrTe <sub>8</sub> (II)           | -0.73               | -2.24               | -1.07               | -0.88               | 0.73                      | 0.50                 |

**Table S6.** Zero-point energy correction ( $\Delta E_{ZPE}$ ), entropy contribution( $T\Delta S$ ), and total free energy correction ( $\Delta E_{ZPE} - T\Delta S$ ) used in the calculations.

| Species          | $\Delta E_{ZPE}$ (eV) | $T\Delta S$ (eV) | $\Delta E_{ZPE} - T\Delta S$ (eV) |
|------------------|-----------------------|------------------|-----------------------------------|
| H <sub>2</sub>   | 0.27                  | 0.40             | -0.13                             |
| H <sub>2</sub> O | 0.56                  | 0.67             | -0.11                             |
| O <sub>2</sub> * | 0.12                  | 0.16             | -0.04                             |
| O*               | 0.06                  | 0.08             | -0.02                             |
| OH*              | 0.33                  | 0.13             | 0.21                              |
| OOH*             | 0.43                  | 0.21             | 0.22                              |

**Table S7.** The lattice parameters of bulk NiTe in *R-3m* phase and the adsorption energy of O<sub>2</sub> on monolayer NiTe in different calculations. The results of calculation in solvent model have been used in the above analysis.

|                                                 | Lattice parameters (Å)                   |
|-------------------------------------------------|------------------------------------------|
| Experimental result <sup>10</sup>               | a=b=c=7.04                               |
| Theoretical result                              | a=b=c=7.06                               |
| Theoretical result (U=6 eV)                     | a=b=c=6.93                               |
|                                                 | Adsorption energy of O <sub>2</sub> (eV) |
| Monolayer NiTe                                  | 0.13                                     |
| Monolayer NiTe ( solvent model)                 | 0.01                                     |
| Monolayer NiTe ( solvent model & vdW & U=6 eV ) | -0.3                                     |

## References

- 1 Wang, Y.; Perdew, J. P., Spin scaling of the electron-gas correlation energy in the high-density limit. *Phys. Rev. B* 1991, **43** (11), 8911-8916.
- 2 Kresse, G.; Furthmüller, J., Efficient iterative schemes for ab initio total-energy calculations using a plane-wave basis set. *Phys. Rev. B* 1996, **54** (16), 11169.
- 3 Monkhorst, H. J.; Pack, J. D., Special points for Brillouin-zone integrations. *Phys. Rev. B* 1976, **13** (12), 5188-5192.
- 4 Nørskov, J. K.; Rossmeisl, J.; Logadottir, A.; Lindqvist, L.; Kitchin, J. R.; Bligaard, T.; Jónsson, H., Origin of the Overpotential for Oxygen Reduction at a Fuel-Cell Cathode. *J. Phys. Chem. B* 2004, **108** (46), 17886-17892.
- 5 Mathew, K.; Sundararaman, R.; Letchworth-Weaver, K.; Arias, T. A.; Hennig, R. G. *J. Chem. Phys.* 2014, **140**, 084106.
- 6 Wang, Y.; Li, Y.; Heine, T., PtTe Monolayer: Two-Dimensional Electrocatalyst with High Basal Plane Activity toward Oxygen Reduction Reaction. *J. Am. Chem. Soc.* 2018, **140** (40), 12732-12735.
- 7 Wang, Y.; Zhou, K., Two-dimensional metallic tantalum ditelluride with an intrinsic basal-plane activity for oxygen reduction: A microkinetic modeling study. *Green Energy Environ.* 2022, **7** (3), 525-532.
- 8 Liu, T.; Wang, Y.; Li, Y., NiTe Monolayer: Two-Dimensional Metal with Superior Basal-Plane Activity for the Oxygen Reduction Reaction. *J. Phys. Chem. C* **2021**, *125* (35), 19164-19170.
- 9 X Zhao, L.; Yu, G.; Huang, X.; Chen, W., Realizing Efficient Catalytic Performance and High Selectivity for Oxygen Reduction Reaction on a 2D Ni<sub>2</sub>SbTe<sub>2</sub> Monolayer. *Inorg. Chem.* 2022, **61** (4), 2284-2291.
- 10 Dvoryankina, G. G.; Pinsker, Z. G. A Study of Thin Layers of Phases in the Ni-Te System. A study of the Beta-Phase of NiTe. *Sov. Phys. Crystallogr.* 1964, **8**, 448-451.
